# Supplementary material
Source: Research Square preprint supplement (doi:10.21203/rs.3.rs-10225258/v1)
Supplement: Supplementary file 1 [file db7ff8a64bf7c8bcbd72ee06.xlsx]

## Sheet: Warburg
Table 1S. Functional annotation of key genes associated with the Warburg effect hallmark in cancer metabolic reprogramming.
Data table header descriptions
Official gene symbols (Gene_Symbol) and descriptions (Gene_Title) were retrieved from the HUGO Gene Nomenclature Committee (HGNC) database.
Official National Center for Biotechnology Unique numerical identifiers correspond to Official National Center for Biotechnology Information
(NCBI_GeneID / Entrez Gene) records.
The System/Pathway column classifies the genes according to their direct involvement in aerobic glycolysis (the Warburg effect),
a core component of the "Deregulating Cellular Energetics" hallmark of cancer.
Biological pathways are mapped based on reference repositories, including KEGG, Reactome, and Gene Ontology (GO).
Gene_Symbol	NCBI_GeneID	Gene_Title	System/Pathway
SLC2A1	6513	solute carrier family 2 member 1	Glycolysis
SLC2A3	6515	solute carrier family 2 member 3	Glycolysis
SLC2A4	6517	solute carrier family 2 member 4	Glycolysis
HK1	3098	hexokinase 1	Glycolysis
HK2	3099	hexokinase 2	Glycolysis
HK3	3101	hexokinase 3	Glycolysis
HKDC1	64141	hexokinase domain containing 1	Glycolysis
GPI	2821	glucose-6-phosphate isomerase	Glycolysis
PFKM	5213	phosphofructokinase, muscle	Glycolysis
PFKP	5214	phosphofructokinase, platelet	Glycolysis
PFKL	5211	phosphofructokinase, liver	Glycolysis
ALDOA	226	aldolase, fructose-bisphosphate A	Glycolysis
ALDOB	229	aldolase, fructose-bisphosphate B	Glycolysis
ALDOC	230	aldolase, fructose-bisphosphate C	Glycolysis
TPI1	7167	triosephosphate isomerase 1	Glycolysis
GAPDH	2597	glyceraldehyde-3-phosphate dehydrogenase	Glycolysis
GAPDHS	26330	glyceraldehyde-3-phosphate dehydrogenase, spermatogenic	Glycolysis
PGK1	5230	phosphoglycerate kinase 1	Glycolysis
PGK2	5232	phosphoglycerate kinase 2	Glycolysis
PGAM1	5223	phosphoglycerate mutase 1	Glycolysis
PGAM2	5224	phosphoglycerate mutase 2	Glycolysis
PGAM4	441531	phosphoglycerate mutase family member 4	Glycolysis
ENO1	2023	enolase 1	Glycolysis
ENO2	2026	enolase 2	Glycolysis
ENO3	2027	enolase 3	Glycolysis
ENO4	387712	enolase 4	Glycolysis
PKM	5315	pyruvate kinase M1/2	Glycolysis
PKLR	5313	pyruvate kinase L/R	Glycolysis
PDHA1	5160	pyruvate dehydrogenase E1 subunit alpha 1	Tricarboxylic Acid (TCA) Cycle
PDHB	5162	pyruvate dehydrogenase E1 subunit beta	Tricarboxylic Acid (TCA) Cycle
DLAT	1737	dihydrolipoamide S-acetyltransferase	Tricarboxylic Acid (TCA) Cycle
DLD	1738	dihydrolipoamide dehydrogenase	Tricarboxylic Acid (TCA) Cycle
PDHX	8050	pyruvate dehydrogenase complex component X	Tricarboxylic Acid (TCA) Cycle
CS	1431	citrate synthase	Tricarboxylic Acid (TCA) Cycle
ACO2	50	aconitase 2	Tricarboxylic Acid (TCA) Cycle
IDH3A	3419	isocitrate dehydrogenase (NAD(+)) 3 subunit alpha	Tricarboxylic Acid (TCA) Cycle
IDH3B	3420	isocitrate dehydrogenase (NAD(+)) 3 subunit beta	Tricarboxylic Acid (TCA) Cycle
IDH3G	3421	isocitrate dehydrogenase (NAD(+)) 3 subunit gamma	Tricarboxylic Acid (TCA) Cycle
IDH2	3418	isocitrate dehydrogenase (NADP(+)) 2, mitochondrial	Tricarboxylic Acid (TCA) Cycle
OGDH	4967	oxoglutarate dehydrogenase	Tricarboxylic Acid (TCA) Cycle
DLST	1743	dihydrolipoamide S-succinyltransferase	Tricarboxylic Acid (TCA) Cycle
SUCLG1	8802	succinate-CoA ligase GDP/ADP-forming subunit alpha	Tricarboxylic Acid (TCA) Cycle
SUCLG2	8801	succinate-CoA ligase GDP-forming subunit beta	Tricarboxylic Acid (TCA) Cycle
SUCLA2	8803	succinate-CoA ligase ADP-forming subunit beta	Tricarboxylic Acid (TCA) Cycle
SDHA	6389	succinate dehydrogenase complex flavoprotein subunit A	Mitochondrial Respiratory Chain
SDHB	6390	succinate dehydrogenase complex iron-sulfur subunit B	Mitochondrial Respiratory Chain
SDHC	6391	succinate dehydrogenase complex subunit C	Mitochondrial Respiratory Chain
SDHD	6392	succinate dehydrogenase complex subunit D	Mitochondrial Respiratory Chain
FH	2271	fumarate hydratase	Tricarboxylic Acid (TCA) Cycle
MDH2	4191	malate dehydrogenase 2	Tricarboxylic Acid (TCA) Cycle
ND1	4535	NADH-ubiquinone oxidoreductase chain 1 (mitochondrial)	Mitochondrial Respiratory Chain
ND2	4536	NADH-ubiquinone oxidoreductase chain 2 (mitochondrial)	Mitochondrial Respiratory Chain
ND3	4537	NADH-ubiquinone oxidoreductase chain 3 (mitochondrial)	Mitochondrial Respiratory Chain
ND4	4538	NADH-ubiquinone oxidoreductase chain 4 (mitochondrial)	Mitochondrial Respiratory Chain
ND4L	4539	NADH-ubiquinone oxidoreductase chain 4L (mitochondrial)	Mitochondrial Respiratory Chain
ND5	4540	NADH-ubiquinone oxidoreductase chain 5 (mitochondrial)	Mitochondrial Respiratory Chain
ND6	4541	NADH-ubiquinone oxidoreductase chain 6 (mitochondrial)	Mitochondrial Respiratory Chain
CYTB	4519	cytochrome b (mitochondrial)	Mitochondrial Respiratory Chain
COI	4512	cytochrome c oxidase subunit I (mitochondrial)	Mitochondrial Respiratory Chain
COII	4513	cytochrome c oxidase subunit II (mitochondrial)	Mitochondrial Respiratory Chain
COIII	4514	cytochrome c oxidase subunit III (mitochondrial)	Mitochondrial Respiratory Chain
ATP6	4508	ATP synthase membrane subunit 6 (mitochondrial)	Mitochondrial Respiratory Chain
ATP8	4509	ATP synthase membrane subunit 8 (mitochondrial)	Mitochondrial Respiratory Chain
NDUFAF1	51103	NADH:ubiquitone oxidoreductase complex assembly factor 1	Mitochondrial Respiratory Chain
NDUFAF2	91942	NADH:ubiquitone oxidoreductase complex assembly factor 2	Mitochondrial Respiratory Chain
NDUFAF3	25915	NADH:ubiquitone oxidoreductase complex assembly factor 3	Mitochondrial Respiratory Chain
NDUFAF4	29078	NADH:ubiquitone oxidoreductase complex assembly factor 4	Mitochondrial Respiratory Chain
NDUFAF5	79133	NADH:ubiquitone oxidoreductase complex assembly factor 5	Mitochondrial Respiratory Chain
NDUFAF6	137682	NADH:ubiquitone oxidoreductase complex assembly factor 6	Mitochondrial Respiratory Chain
NDUFAF7	55471	NADH:ubiquitone oxidoreductase complex assembly factor 7	Mitochondrial Respiratory Chain
NDUFAF8	284184	NADH:ubiquitone oxidoreductase complex assembly factor 8	Mitochondrial Respiratory Chain
CYC1	1537	cytochrome c1	Mitochondrial Respiratory Chain
CYC	54205	cytochrome c, somatic	Mitochondrial Respiratory Chain
UQCRFS1	7386	ubiquinol-cytochrome c reductase iron-sulfur subunit 1	Mitochondrial Respiratory Chain
UQCRB	7381	ubiquinol-cytochrome c reductase binding protein	Mitochondrial Respiratory Chain
UQCRH	7388	ubiquinol-cytochrome c reductase hinge protein	Mitochondrial Respiratory Chain
UQCRC2	7385	ubiquinol-cytochrome c reductase core protein 2	Mitochondrial Respiratory Chain
UQCRC1	7384	ubiquinol-cytochrome c reductase core protein 1	Mitochondrial Respiratory Chain
UQCR11	10971	ubiquinol-cytochrome c reductase subunit 11	Mitochondrial Respiratory Chain
UQCR10	29796	ubiquinol-cytochrome c reductase subunit 10	Mitochondrial Respiratory Chain
TTC19	54902	tetratricopeptide repeat domain 19	Mitochondrial Respiratory Chain
ACAD9	28976	acyl-CoA dehydrogenase family member 9	Mitochondrial Respiratory Chain
TMEM126B	55860	transmembrane protein 126B	Mitochondrial Respiratory Chain
ECSIT	51295	ECSIT signaling integrator	Mitochondrial Respiratory Chain
COA1	55501	cytochrome c oxidase assembly factor 1	Mitochondrial Respiratory Chain
TIMMDC1	51300	translocase of inner mitochondrial membrane domain containing 1	Mitochondrial Respiratory Chain
SDHAF1	644096	succinate dehydrogenase complex assembly factor 1	Mitochondrial Respiratory Chain
SDHAF2	54726	succinate dehydrogenase complex assembly factor 2	Mitochondrial Respiratory Chain
SDHAF3	57001	succinate dehydrogenase complex assembly factor 3	Mitochondrial Respiratory Chain
SDHAF4	135154	succinate dehydrogenase complex assembly factor 4	Mitochondrial Respiratory Chain
BCS1L	617	BCS1 homolog, ubiquinol-cytochrome c reductase chaperone	Mitochondrial Respiratory Chain
UQCC1	55245	ubiquinol-cytochrome c reductase complex chaperone 1	Mitochondrial Respiratory Chain
UQCC2	84300	ubiquinol-cytochrome c reductase complex chaperone 2	Mitochondrial Respiratory Chain
UQCC3	79095	ubiquinol-cytochrome c reductase complex chaperone 3	Mitochondrial Respiratory Chain
LYRM7	90624	LYR motif containing 7	Mitochondrial Respiratory Chain
BRAWNIN	112398863	c12orf73 brawnin microprotein	Mitochondrial Respiratory Chain
SMIM4	201895	small integral membrane protein 4	Mitochondrial Respiratory Chain
SFXN1	9408	sideroflexin 1	Mitochondrial Respiratory Chain
SURF1	6834	SURF1 cytochrome c oxidase assembly factor	Mitochondrial Respiratory Chain
SCO1	6341	SCO1 cytochrome c oxidase assembly protein	Mitochondrial Respiratory Chain
SCO2	9997	SCO2 cytochrome c oxidase assembly protein	Mitochondrial Respiratory Chain
COX10	1352	cytochrome c oxidase assembly factor heme A:farnesyltransferase COX10	Mitochondrial Respiratory Chain
COX15	1355	cytochrome c oxidase assembly factor COX15	Mitochondrial Respiratory Chain
COA3	28958	cytochrome c oxidase assembly factor 3	Mitochondrial Respiratory Chain
COA5	26122	cytochrome c oxidase assembly factor 5	Mitochondrial Respiratory Chain
COA6	388753	cytochrome c oxidase assembly factor 6	Mitochondrial Respiratory Chain
COA7	65260	cytochrome c oxidase assembly factor 7	Mitochondrial Respiratory Chain
COA8	144501	cytochrome c oxidase assembly factor 8	Mitochondrial Respiratory Chain
PET100	100130890	PET100 cytochrome c oxidase assembly factor	Mitochondrial Respiratory Chain
PET117	100303756	PET117 cytochrome c oxidase assembly factor	Mitochondrial Respiratory Chain
TMEM70	54968	transmembrane protein 70	Mitochondrial Respiratory Chain
ATP11	9632	ATPAF1 ATP synthase mitochondrial F1 complex assembly factor 1	Mitochondrial Respiratory Chain
ATP12	23456	ATPAF2 ATP synthase mitochondrial F1 complex assembly factor 2	Mitochondrial Respiratory Chain
TFAM	7019	transcription factor A, mitochondrial	Mitochondrial Respiratory Chain
TFB1M	51106	dimethyladenosine transferase 1, mitochondrial	Mitochondrial Respiratory Chain
TFB2M	64216	dimethyladenosine transferase 2, mitochondrial	Mitochondrial Respiratory Chain
POLRMT	5442	RNA polymerase mitochondrial	Mitochondrial Respiratory Chain
MRPS22	56945	mitochondrial ribosomal protein S22	Mitochondrial Respiratory Chain
MRPL3	11222	mitochondrial ribosomal protein L3	Mitochondrial Respiratory Chain
TIMM8A	200245	translocase of inner mitochondrial membrane 8A	Mitochondrial Respiratory Chain
TOMM40	55800	translocase of outer mitochondrial membrane 40	Mitochondrial Respiratory Chain
FASN	2194	fatty acid synthase	Fatty acid metabolism
ACACA	31	acetyl-CoA carboxylase alpha	Fatty acid metabolism
FADS1	3992	fatty acid desaturase 1	Fatty acid metabolism
FADS2	9415	fatty acid desaturase 2	Fatty acid metabolism
ELOVL2	54898	ELOVL fatty acid elongase 2	Fatty acid metabolism
ELOVL5	29938	ELOVL fatty acid elongase 5	Fatty acid metabolism
CPT1A	1374	carnitine palmitoyltransferase 1A	Fatty acid metabolism
CPT1B	1375	carnitine palmitoyltransferase 1B	Fatty acid metabolism
CPT1C	126129	carnitine palmitoyltransferase 1C	Fatty acid metabolism
ACADM	34	acyl-CoA dehydrogenase medium chain	Fatty acid metabolism
ACADS	35	acyl-CoA dehydrogenase short chain	Fatty acid metabolism
HADHA	3030	hydroxyacyl-CoA dehydrogenase trifunctional multienzyme complex subunit alpha	Fatty acid metabolism
HADHB	3032	hydroxyacyl-CoA dehydrogenase trifunctional multienzyme complex subunit beta	Fatty acid metabolism
ACOX1	51	acyl-CoA oxidase 1	Fatty acid metabolism
PPARA	5465	peroxisome proliferator activated receptor alpha	Fatty acid metabolism
MLXIPL	51085	MLX interacting protein like (ChREBP)	Fatty acid metabolism
CD36	948	CD36 molecule	Fatty acid metabolism
FABP1	2167	fatty acid binding protein 1	Fatty acid metabolism
HIF1A	3091	hypoxia inducible factor 1 subunit alpha	Warburg Effect
MYC	4609	MYC proto-oncogene, bHLH transcription factor	Warburg Effect
TP53	7157	tumor protein p53	Warburg Effect
AKT1	207	AKT serine/threonine kinase 1	Warburg Effect
MTOR	2475	mechanistic target of rapamycin kinase	Warburg Effect
SLC16A1	6566	solute carrier family 16 member 1 (monocarboxylate transporter 1)	Warburg Effect
SLC16A3	6569	solute carrier family 16 member 3 (monocarboxylate transporter 4)	Warburg Effect
LDHA	3939	lactate dehydrogenase A	Warburg Effect
PDK1	5163	pyruvate dehydrogenase kinase 1	Warburg Effect
PDK3	5165	pyruvate dehydrogenase kinase 3	Warburg Effect
PDK4	5166	pyruvate dehydrogenase kinase 4	Warburg Effect
PDP1	54704	pyruvate dehyrogenase phosphatase catalytic subunit 1	Warburg Effect
PFKFB3	5209	6-phosphofructo-2-kinase/fructose-2,6-bifphosphatase 3	Warburg Effect
PFKFB4	5210	6-phosphofructo-2-kinase/fructose-2,6-bifphosphatase 4	Warburg Effect
PIK3CA	5290	phosphatidylinositol-4,5-bisphosphate 3-kinase catalytic subunit alpha	Warburg Effect
PTEN	5728	phosphatase and tensin homolog	Warburg Effect
